# Supplementary material for: SILAC kinase screen identifies potential MASTL substrates
Source: PubMed Central journal article supplement (PMC9217955; doi:10.1038/s41598-022-14933-0), 2022-06-22

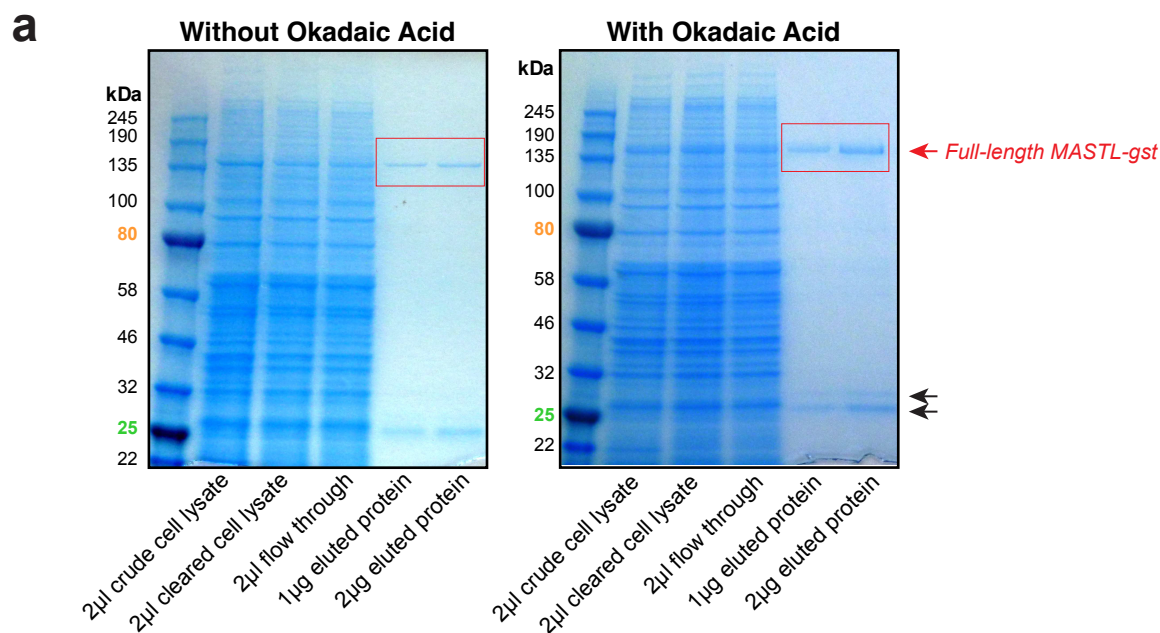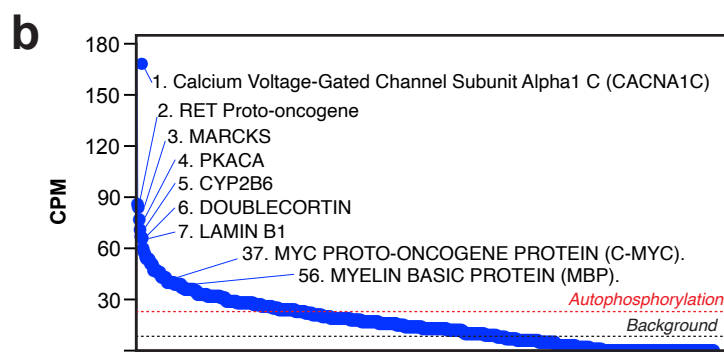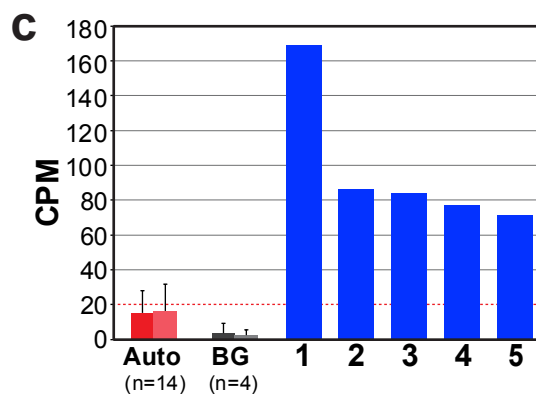

Supplement: 41598_2022_14933_MOESM1_ESM.pdf [file 41598_2022_14933_MOESM1_ESM.pdf]
