# Supplementary material for: SILAC kinase screen identifies potential MASTL substrates
Source: Sci Rep. 2022 Jun 22;12:10568. doi: 10.1038/s41598-022-14933-0 (PMC9217955; doi:10.1038/s41598-022-14933-0)
Supplement: Supplementary file 5 — Supplementary Table S1. [file 41598_2022_14933_MOESM5_ESM.xlsx]

## Sheet: Proteins
Protein FDR Confidence: Combined	Master	Accession	Description	Exp. q-value: Combined	Sum PEP Score	Coverage [%]	# Peptides	# Isoforms	# PSMs	# Unique Peptides	# AAs	MW [kDa]	calc. pI	Score Mascot: Mascot	Score Sequest HT: Sequest HT	# Peptides (by Search Engine): Mascot	# Peptides (by Search Engine): Sequest HT	Biological Process	Cellular Component	Molecular Function	Pfam IDs	Entrez Gene ID	Ensembl Gene ID	Gene Symbol	Chromosome	KEGG Pathways	WikiPathways	Reactome Pathways	# Protein Pathway Groups	# Razor Peptides	Abundance Ratio: (Active) / (CTL)	Abundance Ratio: (DK) / (CTL)	Abundance Ratio Adj. P-Value: (Active) / (CTL)	Abundance Ratio Adj. P-Value: (DK) / (CTL)	Abundance Ratio Variability [%]: (Active) / (CTL)	Abundance Ratio Variability [%]: (DK) / (CTL)	Abundances (Grouped): Active	Abundances (Grouped): CTL	Abundances (Grouped): DK	Abundances (Grouped) CV [%]: Active	Abundances (Grouped) CV [%]: CTL	Abundances (Grouped) CV [%]: DK	Found in Sample: [S2] F2: Sample, Active, Rep1	Found in Sample: [S5] F5: Sample, Active, Rep2	Found in Sample: [S1] F1: Sample, CTL, Rep1	Found in Sample: [S4] F4: Sample, CTL, Rep2	Found in Sample: [S3] F3: Sample, DK, Rep1	Found in Sample: [S6] F6: Sample, DK, Rep2
High	Master Protein	P67809	Nuclease-sensitive element-binding protein 1 OS=Homo sapiens OX=9606 GN=YBX1 PE=1 SV=3	0	1615.01	92	52	226	9029	45	324	35.9	9.88	143012	14982.5	31	50	metabolic process;regulation of biological process	cytoplasm;cytosol;extracellular;membrane;nucleus;spliceosomal complex	DNA binding;protein binding;RNA binding	Pf00313	4904	ENSG00000065978.18	YBX1	1		Brain-Derived Neurotrophic Factor (BDNF) signaling pathway; Mecp2 and Associated Rett Syndrome; mRNA Processing; Sudden Infant Death Syndrome (SIDS) Susceptibility Pathways	mRNA Splicing - Major Pathway; mRNA Splicing - Minor Pathway	9	23	0.74	0.917	0.412971	0.998314	2.04	20.96	83.6	112.9	103.5	13.13	11.2	8.69	High	High	High	High	High	High
Confidence	Annotated Sequence	Modifications	Qvality PEP	Qvality q-value	# Protein Groups	# Proteins	# Isoforms	# PSMs	Master Protein Accessions	Positions in Master Proteins	# Missed Cleavages	Theo. MH+ [Da]	Abundance Ratio: (Active) / (CTL)	Abundance Ratio: (DK) / (CTL)	Abundance Ratio Adj. P-Value: (Active) / (CTL)	Abundance Ratio Adj. P-Value: (DK) / (CTL)	Abundance Ratio Variability [%]: (Active) / (CTL)	Abundance Ratio Variability [%]: (DK) / (CTL)	Abundances (Grouped): Active	Abundances (Grouped): CTL	Abundances (Grouped): DK	Abundances (Grouped) CV [%]: Active	Abundances (Grouped) CV [%]: CTL	Abundances (Grouped) CV [%]: DK	Quan Info	Found in Sample: [S2] F2: Sample, Active, Rep1	Found in Sample: [S5] F5: Sample, Active, Rep2	Found in Sample: [S1] F1: Sample, CTL, Rep1	Found in Sample: [S4] F4: Sample, CTL, Rep2	Found in Sample: [S3] F3: Sample, DK, Rep1	Found in Sample: [S6] F6: Sample, DK, Rep2	Confidence (by Search Engine): Mascot	Confidence (by Search Engine): Sequest HT	Percolator q-Value (by Search Engine): Sequest HT	Percolator PEP (by Search Engine): Sequest HT	XCorr (by Search Engine): Sequest HT	Top Apex RT [min]	Site [Position]	Position	n Active	n CTL	n DK
High	[R].NGYGFINRNDTKEDVFVHQTAIK.[KR]	1xDeamidated [N]; 1xPhospho [T11(99.4)]	0.158926	0.00226722	2	3	2	2	Q9Y2T7; P67809	Q9Y2T7 [105-127]; P67809 [70-92]	2	2747.28	100				0		300			24.43			Shared	High	High	Not Found	Not Found	Not Found	Not Found	n/a	High	0.0001142	0.008348	1.96	67.7	#Thr80 [70-92]	070-92	2	0	0
High	[R].NDTKEDVFVHQTAIK.[KR]	1xPhospho [T3(100)]	0.00038365	0.00125272	2	3	1	2	Q9Y2T7; P67809	Q9Y2T7 [113-127]; P67809 [78-92]	1	1824.85	18.616	0.929	0.516767	0.991954	22.71	22.63	271.8	14.6	13.6	83.47	68.15	83.42	Shared	High	Peak Found	Peak Found	Peak Found	High	Peak Found	n/a	High	0.0001142	7.365e-08	3.67	50.46	Thr80 [78-92]	078-92	2	2	2
High	[R].NDTKEDVFVHQTAIK.[KR]	1xDeamidated [N1]; 1xPhospho [T3(100)]	0.0257009	0.00125272	2	3	1	1	Q9Y2T7; P67809	Q9Y2T7 [113-127]; P67809 [78-92]	1	1825.84													No Quan Values	High	Not Found	Not Found	Not Found	Not Found	Not Found	n/a	High	0.0001142	0.000228	2.44		#Thr80 [78-92]	078-92	1	0	0
High	[R].NDTKEDVFVHQTAIKK.[N]	1xPhospho [T3(100)]	0.0290908	0.00125272	1	2	1	1	P67809	P67809 [78-93]	2	1952.95	100				0		300							High	Not Found	Not Found	Not Found	Not Found	Not Found	n/a	High	0.0001142	0.0002894	2.92	45.45	Thr80 [78-93]	078-93	1	0	0
High	[K].YLRSVGDGETVEFDVVEGEK.[G]	1xPhospho [S4(100)]	0.00154917	0.00125272	1	2	1	2	P67809	P67809 [99-118]	1	2308.04	100				0		300			43.2				High	High	Not Found	Not Found	Not Found	Not Found	n/a	High	0.0001142	1.053e-06	4.22	71.38	Ser102 [99-118]	099-118	2	0	0
High	[R].SVGDGETVEFDVVEGEK.[G]	1xPhospho [S1(100)]	0.000101324	0.00125272	2	3	2	4	Q9Y2T7; P67809	Q9Y2T7 [137-153]; P67809 [102-118]	0	1875.79	11.881	0.928	0.623767	0.991954	48.36	167.92	258.1	21.7	20.2	75.64	38.1	119.9	Shared	High	High	Peak Found	Peak Found	Peak Found	Peak Found	n/a	High	0.0001142	5.785e-09	4.91	71.92	Ser102 [102-118]	102-118	2	2	2
High	[R].SVGDGETVEFDVVEGEKGAEAANVTGPGGVPVQGSK.[Y]	1xPhospho [S1(100)]	4.40089e-05	0.00125272	1	1	1	1	P67809	P67809 [102-137]	1	3552.64	100				0		300			59.89				High	Peak Found	Not Found	Not Found	Not Found	Not Found	n/a	High	0.0001142	1.179e-09	3.51	77.12	Ser102 [102-137]	102-137	2	0	0
High	[R].NYQQNYQNSESGEKNEGSESAPEGQAQQR.[R]	1xPhospho [S20(100)]	0.000136372	0.00125272	1	1	2	14	P67809	P67809 [157-185]	1	3337.36	1.306	1.029	0.999562	0.991954	33.8	24.21	117.5	90	92.5	20.72	11.07	11.87		High	High	High	High	High	High	n/a	High	0.0001142	1.02e-08	4.83	41.24	Ser176 [157-185]	157-185	2	2	2
High	[R].RPQYSNPPVQGEVMEGADNQGAGEQGRPVR.[Q]	1xPhospho [S5(100)]	0.0271031	0.00125272	1	1	1	3	P67809	P67809 [205-234]	0	3303.5	44.139	0.129			13.89	950.44	279.6	6.3	14.1	51.99	40.18			High	High	Peak Found	Peak Found	Peak Found	Not Found	n/a	High	0.0001142	0.0002524	3.09	52.35	Ser209 [205-234]	205-234	2	2	1
High	[R].RPQYSNPPVQGEVMEGADNQGAGEQGRPVR.[Q]	1xDeamidated [Q10]; 2xPhospho [Y4(100); S5(100)]	0.205038	0.00226722	1	1	1	1	P67809	P67809 [205-234]	0	3384.45													No Quan Values	Not Found	Not Found	Not Found	Not Found	High	Not Found	n/a	High	0.0001142	0.01426	1.64		#Tyr208/Ser209 [205-234]	205-234	0	0	1
High	[R].RPQYSNPPVQGEVMEGADNQGAGEQGRPVR.[Q]	3xDeamidated [Q3; N6; N19]; 1xPhospho [Y/S]	0.0647893	0.00125272	1	1	1	1	P67809	P67809 [205-234]	0	3306.45	0.277	0.244			2050.42	1802.17	120.1	87	92.9		132.54			Peak Found	Not Found	Peak Found	High	Peak Found	Not Found	n/a	High	0.0001142	0.001379	1.73	45.84	#Tyr/Ser [205-234]	205-234	1	2	1
High	[R].RPQYSNPPVQGEVMEGADNQGAGEQGRPVR.[Q]	1xOxidation [M14]; 1xPhospho [S5(100)]	0.000137352	0.00125272	1	1	2	4	P67809	P67809 [205-234]	0	3319.49	100	100			0	0	278.8		21.2	40.36				High	High	High	Not Found	High	Not Found	n/a	High	0.0001142	1.035e-08	4.43	47.48	#Ser209 [205-234]	205-234	2	1	1
High	[R].RPQYSNPPVQGEVMEGADNQGAGEQGRPVR.[Q]	1xDeamidated [Q10]; 1xOxidation [M14]; 1xPhospho [S5(100)]	0.00231271	0.00125272	1	1	1	1	P67809	P67809 [205-234]	0	3320.48	7.624	0.302			966.71	0	188.7	85.4	25.8	123.11				High	Peak Found	Not Found	Peak Found	Not Found	Peak Found	n/a	High	0.0001142	2.273e-06	5.03	47.83	##Ser209 [205-234]	205-234	2	1	1
High	Master Protein	P31749	RAC-alpha serine/threonine-protein kinase OS=Homo sapiens OX=9606 GN=AKT1 PE=1 SV=2	0	1578.35	93	71	234	3106	51	480	55.7	6.07	22633	5357.26	48	70	cell death;cell differentiation;cell organization and biogenesis;cell proliferation;defense response;development;metabolic process;regulation of biological process;response to stimulus;transport	cytoplasm;cytoskeleton;cytosol;membrane;mitochondrion;nucleus	catalytic activity;enzyme regulator activity;nucleotide binding;protein binding	Pf00069, Pf00169, Pf00433, Pf07714, Pf14531, Pf15413	207	ENSG00000142208.15	AKT1	14	Dopaminergic synapse; Chagas disease (American trypanosomiasis); Longevity regulating pathway - multiple species; T cell receptor signaling pathway; TNF signaling pathway; Osteoclast differentiation; Tight junction; Hepatitis B; Insulin signaling pathway; HIF-1 signaling pathway; Central carbon metabolism in cancer; Pancreatic cancer; FoxO signaling pathway; Prolactin signaling pathway; Phospholi…	IL-5 Signaling Pathway; Androgen receptor signaling pathway; AMP-activated Protein Kinase (AMPK) Signaling; Regulation of toll-like receptor signaling pathway; Target Of Rapamycin (TOR) Signaling; Angiogenesis; MicroRNAs in cardiomyocyte hypertrophy; TFs Regulate miRNAs related to cardiac hypertrophy; Integrin-mediated Cell Adhesion; IL-1 signaling pathway; Sterol Regulatory Element-Binding Prote…	Regulation of PTEN stability and activity; mTOR signalling; KSRP (KHSRP) binds and destabilizes mRNA; CTLA4 inhibitory signaling; G beta:gamma signalling through PI3Kgamma; Translocation of GLUT4 to the plasma membrane; AKT phosphorylates targets in the nucleus; Butyrate Response Factor 1 (BRF1) binds and destabilizes mRNA; AKT phosphorylates targets in the cytosol; PI5P, PP2A and IER3 Regulate P…	233	42	100	100	0.392088	0.244301	0	0	232.2	0.3	67.5	54.29	79.98	76.38	High	High	High	High	High	High
Confidence	Annotated Sequence	Modifications	Qvality PEP	Qvality q-value	# Protein Groups	# Proteins	# Isoforms	# PSMs	Master Protein Accessions	Positions in Master Proteins	# Missed Cleavages	Theo. MH+ [Da]	Abundance Ratio: (Active) / (CTL)	Abundance Ratio: (DK) / (CTL)	Abundance Ratio Adj. P-Value: (Active) / (CTL)	Abundance Ratio Adj. P-Value: (DK) / (CTL)	Abundance Ratio Variability [%]: (Active) / (CTL)	Abundance Ratio Variability [%]: (DK) / (CTL)	Abundances (Grouped): Active	Abundances (Grouped): CTL	Abundances (Grouped): DK	Abundances (Grouped) CV [%]: Active	Abundances (Grouped) CV [%]: CTL	Abundances (Grouped) CV [%]: DK	Quan Info	Found in Sample: [S2] F2: Sample, Active, Rep1	Found in Sample: [S5] F5: Sample, Active, Rep2	Found in Sample: [S1] F1: Sample, CTL, Rep1	Found in Sample: [S4] F4: Sample, CTL, Rep2	Found in Sample: [S3] F3: Sample, DK, Rep1	Found in Sample: [S6] F6: Sample, DK, Rep2	Confidence (by Search Engine): Mascot	Confidence (by Search Engine): Sequest HT	Percolator q-Value (by Search Engine): Sequest HT	Percolator PEP (by Search Engine): Sequest HT	XCorr (by Search Engine): Sequest HT	Top Apex RT [min]	Site [Position]	Position	n Active	n CTL	n DK
High	[R].EAPLNNFSVAQCQLMK.[T]	1xCarbamidomethyl [C12]; 1xPhospho [S8(100)]	0.0156319	0.00125272	1	1	1	4	P31749	P31749 [49-64]	0	1929.86	100	3.944			0	0	272.5	5.6	21.9	89.93				High	High	Peak Found	Not Found	High	Not Found	n/a	High	0.0001142	8.764e-05	2.91	77.27	#Ser56 [49-64]	049-64	2	1	1
High	[R].EAPLNNFSVAQCQLMK.[T]	1xCarbamidomethyl [C12]; 1xDeamidated [N5]; 1xPhospho [S8(100)]	0.109105	0.00125272	1	1	1	2	P31749	P31749 [49-64]	0	1930.84	100				0		300			111.29				High	Peak Found	Not Found	Not Found	Not Found	Not Found	n/a	High	0.0001142	0.003889	2.68	78.74	##Ser56 [49-64]	049-64	2	0	0
High	[R].EAPLNNFSVAQCQLMK.[T]	1xCarbamidomethyl [C12]; 1xOxidation [M15]; 1xPhospho [S8(100)]	0.000889617	0.00125272	1	1	1	11	P31749	P31749 [49-64]	0	1945.85	100	100			0	0	287.9		12.1	26.99		50.07		High	High	Not Found	Not Found	Peak Found	Peak Found	n/a	High	0.0001142	3.66e-07	3.84	68.94	###Ser56 [49-64]	049-64	2	0	2
High	[R].EAPLNNFSVAQCQLMK.[T]	1xCarbamidomethyl [C12]; 1xDeamidated [N]; 1xOxidation [M15]; 1xPhospho [S8(100)]	0.0168448	0.00125272	1	1	2	7	P31749	P31749 [49-64]	0	1946.84	100	100			0	0	292.4		7.6	54.65				High	High	Not Found	Not Found	Peak Found	Not Found	n/a	High	0.0001142	0.0001014	2.94	71.36	####Ser56 [49-64]	049-64	2	0	1
High	[K].TERPRPNTFIIR.[C]	1xPhospho [T8(100)]	0.099232	0.00125272	1	1	1	6	P31749	P31749 [65-76]	0	1579.81	100	100			0	0	273.3	0.2	26.5	57.27		81.73		High	High	Peak Found	Not Found	High	Peak Found	n/a	High	0.0001142	0.003206	2.88	51.08	Thr72 [65-76]	065-76	2	1	2
High	[R].CLQWTTVIER.[T]	1xCarbamidomethyl [C1]; 1xPhospho [T6(99.6)]	0.214301	0.00559427	3	3	3	5	P31751; P31749; Q9Y243	P31751 [77-86]; P31749 [77-86]; Q9Y243 [76-85]	0	1385.63	100	100			0	0	290.3		9.7	88.5		104.33	Shared	High	High	Not Found	Not Found	High	Peak Found	n/a	High	0.0001142	0.01561	2.42	75.96	#Thr82 [77-86]	077-86	2	0	2
High	[R].TFHVETPEER.[E]	1xPhospho [T6(100)]	0.202454	0.00226722	1	1	1	2	P31749	P31749 [87-96]	0	1324.56	100	100			0	0	231.9		68.1	84.34		95.29		High	Peak Found	Not Found	Not Found	High	Peak Found	n/a	High	0.0001142	0.01385	3.42	45.06	Thr92 [87-96]	087-096	2	0	2
High	[R].TFHVETPEEREEWTTAIQTVADGLK.[K]	1xPhospho [T6(100)]	0.000164268	0.00125272	1	1	4	23	P31749	P31749 [87-111]	1	2967.38	100	77.618			0	37.97	248	1.7	50.4	40.21		84.6		High	High	High	Not Found	High	High	n/a	High	0.0001142	1.453e-08	4.77	91.64	Thr92 [87-111]	087-111	2	1	2
High	[R].TFHVETPEEREEWTTAIQTVADGLKK.[Q]	1xPhospho [T6(100)]	0.00816827	0.00125272	1	1	1	6	P31749	P31749 [87-112]	2	3095.47	100	100			0	0	253.5		46.5	19.29		114.69		High	High	Not Found	Not Found	High	Peak Found	n/a	High	0.0001142	2.538e-05	3.31	86.12	Thr92 [87-112]	087-112	2	0	2
High	[R].EEWTTAIQTVADGLK.[K]	1xPhospho [T5(100)]	0.00143702	0.00125272	1	1	2	3	P31749	P31749 [97-111]	0	1741.8	100				0		300			54.28				High	High	Not Found	Not Found	Not Found	Not Found	n/a	High	0.0001142	9.16e-07	4.22	84.16	Thr102 [97-111]	097-111	2	0	0
High	[R].EEWTTAIQTVADGLKK.[Q]	1xPhospho [T9(100)]	0.080552	0.00125272	1	1	1	1	P31749	P31749 [97-112]	1	1869.9	100				0		300			72.75				High	Peak Found	Not Found	Not Found	Not Found	Not Found	n/a	High	0.0001142	0.002111	3.01	76.64	Thr105 [97-112]	097-112	2	0	0
High	[R].SGSPSDNSGAEEMEVSLAKPK.[H]	1xPhospho [S8(100)]	6.33998e-05	0.00125272	1	1	3	10	P31749	P31749 [122-142]	0	2199.95	100	100			0	0	258.3	0.6	41.1	54.55		100.12		High	High	Peak Found	Not Found	High	High	n/a	High	0.0001142	2.362e-09	3.93	57.23	Ser129 [122-142]	122-142	2	1	2
High	[R].SGSPSDNSGAEEMEVSLAKPK.[H]	1xOxidation [M13]; 1xPhospho [S]	0.00326015	0.00125272	1	1	4	11	P31749	P31749 [122-142]	0	2215.94	100	100			0	0	227.2		72.8	45.13		77.96		High	High	Not Found	Not Found	High	Peak Found	n/a	High	0.0001142	4.365e-06	4.11	47.8	#Ser [122-142]	122-142	2	0	2
High	[K].HRVTMNEFEYLK.[L]	1xPhospho [T4(100)]	3.5759e-05	0.00125272	1	1	1	12	P31749	P31749 [143-154]	1	1646.74	100	100			0	0	280.1	0.3	19.6	45.36		119.98		High	High	Peak Found	Not Found	High	High	n/a	High	0.0001142	7.942e-10	7.07	61.44	Thr146 [143-154]	143-154	2	1	2
High	[K].HRVTMNEFEYLK.[L]	1xOxidation [M5]; 1xPhospho [T4(100)]	9.53428e-05	0.00125272	1	1	1	37	P31749	P31749 [143-154]	1	1662.73	100	84.416	0.330595	0.878817	0	25.24	278.3	0.2	21.5	0.2	15.09	93.13		High	High	Peak Found	Peak Found	High	High	n/a	High	0.0001142	5.137e-09	5.38	52.69	#Thr146 [143-154]	143-154	2	2	2
High	[K].HRVTMNEFEYLK.[L]	1xDeamidated [N6]; 1xPhospho [T4(100)]	0.0643407	0.00125272	1	1	1	3	P31749	P31749 [143-154]	1	1647.72	100	100			0	0	279.6		20.4	54.91		123.63		High	High	Not Found	Not Found	Peak Found	Peak Found	n/a	High	0.0001142	0.001359	2.97	59.34	##Thr146 [143-154]	143-154	2	0	2
High	[K].HRVTMNEFEYLK.[L]	1xDeamidated [N6]; 1xOxidation [M5]; 1xPhospho [T4(100)]	0.0394094	0.00125272	1	1	1	1	P31749	P31749 [143-154]	1	1663.72	21.995	15.475			320.73	467.54	218.1	47.9	34	8.61		118.54		High	Peak Found	Peak Found	Not Found	Peak Found	Peak Found	n/a	High	0.0001142	0.0005208	4.54	54.78	###Thr146 [143-154]	143-154	2	1	2
High	[R].VTMNEFEYLK.[L]	1xPhospho [T2(100)]	0.178677	0.00226722	1	1	1	2	P31749	P31749 [145-154]	0	1353.58	100	100			0	0	262.6		37.4	67.29				High	High	Not Found	Not Found	Peak Found	Not Found	n/a	High	0.0001142	0.01068	1.92	76.43	Thr146 [145-154]	145-154	2	0	1
High	[R].VTMNEFEYLK.[L]	1xOxidation [M3]; 1xPhospho [T2(100)]	0.178677	0.00226722	1	1	1	3	P31749	P31749 [145-154]	0	1369.57	100	100			0	0	245.4		54.6	115.46				High	Peak Found	Not Found	Not Found	Peak Found	Not Found	n/a	High	0.0001142	0.0107	2.23	67.01	#Thr146 [145-154]	145-154	2	0	1
High	[K].KEVIVAKDEVAHTLTENR.[V]	1xPhospho [T15(100)]	0.153293	0.00226722	1	1	2	2	P31749	P31749 [183-200]	2	2132.07	11.42	1			640.68	7412.26	172.4	117.1	10.5	16.99				High	Peak Found	Not Found	Peak Found	Peak Found	Not Found	n/a	High	0.0001142	0.007782	2.51	46.49	Thr197 [183-200]	183-200	2	1	1
High	[K].EVIVAKDEVAHTLTENR.[V]	1xPhospho [T12(100)]	0.000258796	0.00125272	1	1	2	7	P31749	P31749 [184-200]	1	2003.98	100	100			0	0	283.1		16.9	60.51		82.32		High	High	Not Found	Not Found	High	Peak Found	n/a	High	0.0001142	3.475e-08	6.08	50.35	Thr195 [184-200]	184-200	2	0	2
High	[K].EVIVAKDEVAHTLTENR.[V]	1xDeamidated [N16]; 1xPhospho [T]	0.236042	0.00559427	1	1	1	1	P31749	P31749 [184-200]	1	2004.96													No Quan Values	Not Found	High	Not Found	Not Found	Not Found	Not Found	n/a	High	0.0003337	0.01924	1.71		#Thr [184-200]	184-200	1	0	0
High	[K].DEVAHTLTENR.[V]	1xPhospho [T6(100)]	0.123145	0.00226722	1	1	1	1	P31749	P31749 [190-200]	0	1364.58	100	100			0	0	260.2		39.8	86.67				High	Peak Found	Not Found	Not Found	Peak Found	Not Found	n/a	High	0.0001142	0.00496	1.81	41.11	Thr195 [190-200]	190-200	2	0	1
High	[K].EGIKDGATMKTFCGTPEYLAPEVLEDNDYGR.[A]	1xCarbamidomethyl [C13]; 1xPhospho [T11(100)]	0.000133475	0.00125272	1	1	2	13	P31749	P31749 [298-328]	2	3556.56	100	100			0	0	269.7		30.3	60.42		115.15		High	High	Not Found	Not Found	High	High	n/a	High	0.0001142	9.768e-09	7.22	80.95	#Thr308 [298-328]	298-328	2	0	2
High	[K].EGIKDGATMKTFCGTPEYLAPEVLEDNDYGR.[A]	1xCarbamidomethyl [C13]; 2xPhospho [T8(99.1); T11(99.1)]	0.0320042	0.00125272	1	1	1	1	P31749	P31749 [298-328]	2	3636.53	100				0		300							High	Not Found	Not Found	Not Found	Not Found	Not Found	n/a	High	0.0001142	0.0003495	2.03	84.7	#Thr305/Thr308 [298-328]	298-328	1	0	0
High	[K].EGIKDGATMKTFCGTPEYLAPEVLEDNDYGR.[A]	1xCarbamidomethyl [C13]; 1xDeamidated [N27]; 1xPhospho [T/Y]	0.00132349	0.00125272	1	1	1	4	P31749	P31749 [298-328]	2	3557.55	100	100			0	0	211.6		88.4	92.82		130.8		High	High	Not Found	Not Found	High	Peak Found	n/a	High	0.0001142	7.81e-07	3.83	81.18	#Thr/Tyr [298-328]	298-328	2	0	2
High	[K].EGIKDGATMKTFCGTPEYLAPEVLEDNDYGR.[A]	1xCarbamidomethyl [C13]; 1xOxidation [M9]; 1xPhospho [T/Y]	0.000562665	0.00125272	1	1	3	39	P31749	P31749 [298-328]	2	3572.56	100	100			0	0	251.8		48.2	1.27		86.26		High	High	Not Found	Not Found	High	High	n/a	High	0.0001142	1.528e-07	4.28	77.68	##Thr/Tyr [298-328]	298-328	2	0	2
High	[K].EGIKDGATMKTFCGTPEYLAPEVLEDNDYGR.[A]	2xCarbamidomethyl [K10; C13]; 1xPhospho [T/Y]	0.0853936	0.00125272	1	1	1	6	P31749	P31749 [298-328]	2	3613.59	57.78	37.519			85.46	169.77	246.2	8.5	45.3	19.53		105.82		High	High	Peak Found	Not Found	High	Peak Found	n/a	High	0.0001142	0.002378	2.05	72.78	##Thr/Tyr [298-328]	298-328	2	1	2
High	[K].EGIKDGATMKTFCGTPEYLAPEVLEDNDYGR.[A]	1xCarbamidomethyl [C13]; 1xOxidation [M9]; 2xPhospho [T/Y]	0.13792	0.00226722	1	1	1	1	P31749	P31749 [298-328]	2	3652.53	100	100			0	0	237.1		62.9	81.77				Peak Found	High	Not Found	Not Found	Peak Found	Not Found	n/a	High	0.0001142	0.006246	1.84	81.36	###Thr/Tyr [298-328]	298-328	2	0	1
High	[K].EGIKDGATMKTFCGTPEYLAPEVLEDNDYGR.[A]	1xCarbamidomethyl [C13]; 1xDeamidated [N27]; 1xOxidation [M9]; 2xPhospho [T/Y]	0.201812	0.00226722	1	1	1	1	P31749	P31749 [298-328]	2	3653.51	100	100			0	0	231.8		68.2	62.45				High	Peak Found	Not Found	Not Found	Peak Found	Not Found	n/a	High	0.0001142	0.01375	1.5	81.38	####Thr/Tyr [298-328]	298-328	2	0	1
High	[K].EGIKDGATMKTFCGTPEYLAPEVLEDNDYGR.[A]	1xCarbamidomethyl [C13]; 1xDeamidated [N27]; 1xOxidation [M9]; 1xPhospho [T/Y]	0.00340309	0.00125272	1	1	3	11	P31749	P31749 [298-328]	2	3573.54	100	100			0	0	246.8		53.2	30.18		57.76		High	High	Not Found	Not Found	High	Peak Found	n/a	High	0.0001142	4.743e-06	1.97	76.94	#####Thr/Tyr [298-328]	298-328	2	0	2
High	[K].EGIKDGATMKTFCGTPEYLAPEVLEDNDYGR.[A]	2xCarbamidomethyl [K4; C13]; 1xDeamidated [N27]; 1xPhospho [T/Y]	0.0930157	0.00125272	1	1	1	1	P31749	P31749 [298-328]	2	3614.57	100	100			0	0	235.6		64.4					High	Not Found	Not Found	Not Found	Peak Found	Not Found	n/a	High	0.0001142	0.002827	2.25	71.22	######Thr/Tyr [298-328]	298-328	1	0	1
High	[K].DGATMKTFCGTPEYLAPEVLEDNDYGR.[A]	1xCarbamidomethyl [C9]; 1xOxidation [M5]; 2xPhospho [T7(99.4); T11(99.4)]	0.0336264	0.00125272	1	1	1	1	P31749	P31749 [302-328]	1	3225.28	100				0		300							High	Not Found	Not Found	Not Found	Not Found	Not Found	n/a	High	0.0001142	0.000385	2.78	84.39	#Thr308/Thr312 [302-328]	302-328	1	0	0
High	[K].DGATMKTFCGTPEYLAPEVLEDNDYGR.[A]	1xCarbamidomethyl [C9]; 1xOxidation [M5]; 1xPhospho [T7(99.7)]	1.18889e-06	0.00125272	1	1	3	28	P31749	P31749 [302-328]	1	3145.32	100	100			0	0	251		49	5.42		86.56		High	High	Not Found	Not Found	High	High	n/a	High	0.0001142	1.193e-12	5.16	82.03	#Thr308 [302-328]	302-328	2	0	2
High	[K].DGATMKTFCGTPEYLAPEVLEDNDYGR.[A]	1xCarbamidomethyl [C9]; 1xPhospho [T4(99.4)]	0.000487614	0.00125272	1	1	3	9	P31749	P31749 [302-328]	1	3129.32	100	100			0	0	263.9		36.1	57.35		106.13		High	High	Not Found	Not Found	High	High	n/a	High	0.0001142	1.162e-07	4.48	85.36	#Thr305 [302-328]	302-328	2	0	2
High	[K].DGATMKTFCGTPEYLAPEVLEDNDYGR.[A]	2xCarbamidomethyl [K6; C9]; 1xPhospho [T/Y]	0.0172695	0.00125272	1	1	1	10	P31749	P31749 [302-328]	1	3186.34	100	100			0	0	264.8		35.2	7.77		93.44		High	High	Not Found	Not Found	High	High	n/a	High	0.0001142	0.0001064	2.81	76.62	#Thr/Tyr [302-328]	302-328	2	0	2
High	[K].DGATMKTFCGTPEYLAPEVLEDNDYGR.[A]	1xCarbamidomethyl [C9]; 1xDeamidated [N23]; 1xPhospho [T4(99.6)]	0.00153812	0.00125272	1	1	2	2	P31749	P31749 [302-328]	1	3130.31	100	100			0	0	256.3		43.7					High	Not Found	Not Found	Not Found	Peak Found	Not Found	n/a	High	0.0001142	1.039e-06	2.92	85.29	##Thr305 [302-328]	302-328	1	0	1
High	[K].DGATMKTFCGTPEYLAPEVLEDNDYGR.[A]	1xCarbamidomethyl [C9]; 1xDeamidated [N23]; 1xOxidation [M5]; 1xPhospho [T/Y]	0.0210717	0.00125272	1	1	1	2	P31749	P31749 [302-328]	1	3146.3	100	100			0	0	247		53	20.57		103.6		Peak Found	High	Not Found	Not Found	High	Peak Found	n/a	High	0.0001142	0.0001563	1.93	81.96	##Thr/Tyr [302-328]	302-328	2	0	2
High	[K].DGATMKTFCGTPEYLAPEVLEDNDYGR.[A]	2xCarbamidomethyl [K6; C9]; 1xDeamidated [N23]; 1xPhospho [T/Y]	0.00328355	0.00125272	1	1	1	1	P31749	P31749 [302-328]	1	3187.33	100	100			0	0	235		65	36.73				High	Peak Found	Not Found	Not Found	Peak Found	Not Found	n/a	High	0.0001142	4.437e-06	2.46	76.03	###Thr/Tyr [302-328]	302-328	2	0	1
High	[K].TFCGTPEYLAPEVLEDNDYGR.[A]	1xCarbamidomethyl [C3]; 1xPhospho [T1(100)]	0.000668125	0.00125272	3	3	3	22	P31751; P31749; Q9Y243	P31751 [309-329]; P31749 [308-328]; Q9Y243 [305-325]	0	2526.05	100	100			0	0	244.3		55.7	9.49		89.24	Shared	High	High	Not Found	Not Found	High	High	n/a	High	0.0001142	2.122e-07	3.88	88.09	#Thr308 [308-328]	308-328	2	0	2
High	[K].TFCGTPEYLAPEVLEDNDYGR.[A]	1xCarbamidomethyl [C3]; 1xDeamidated [N17]; 1xPhospho [T1(100)]	0.000905679	0.00125272	3	3	2	5	P31751; P31749; Q9Y243	P31751 [309-329]; P31749 [308-328]; Q9Y243 [305-325]	0	2527.04	100	100			0	0	262		38	24.18		120.47	Shared	High	High	Not Found	Not Found	High	Peak Found	n/a	High	0.0001142	3.798e-07	4.08	87.64	##Thr308 [308-328]	308-328	2	0	2
High	[K].KLSPPFKPQVTSETDTR.[Y]	1xPhospho [S3(100)]	0.00215303	0.00125272	1	1	2	6	P31749	P31749 [420-436]	1	2010.99	100	100			0	0	240.4		59.6	16.67		52.37		High	High	Not Found	Not Found	High	High	n/a	High	0.0001142	1.978e-06	3.2	58.74	Ser422 [420-436]	420-436	2	0	2
High	[R].YFDEEFTAQMITITPPDQDDSMECVDSER.[R]	1xCarbamidomethyl [C24]; 1xDeamidated [Q]; 2xOxidation [M10; M22]; 1xPhospho [T14(98.9)]	0.0911301	0.00125272	1	1	2	2	P31749	P31749 [437-465]	0	3582.38													No Quan Values	Not Found	High	Not Found	Not Found	High	Not Found	n/a	High	0.0001142	0.002699	1.91		#Thr450 [437-465]	437-465	1	0	1
High	[R].YFDEEFTAQMITITPPDQDDSMECVDSER.[R]	1xCarbamidomethyl [C24]; 2xOxidation [M10; M22]; 1xPhospho [S21(100)]	0.000628686	0.00125272	1	1	1	5	P31749	P31749 [437-465]	0	3581.4	100	100			0	0	267.4		32.6	84.13		134.24		High	High	Not Found	Not Found	High	Peak Found	n/a	High	0.0001142	1.884e-07	4.42	81.5	#Ser457 [437-465]	437-465	2	0	2
High	[R].YFDEEFTAQMITITPPDQDDSMECVDSER.[R]	1xCarbamidomethyl [C24]; 1xDeamidated [Q]; 1xOxidation [M10]; 1xPhospho [S21(100)]	0.138378	0.00226722	1	1	2	2	P31749	P31749 [437-465]	0	3566.38	100				0		300							High	Not Found	Not Found	Not Found	Not Found	Not Found	n/a	High	0.0001142	0.00628	2.08	86.75	##Ser457 [437-465]	437-465	1	0	0
